1 **Simple and Rapid High-Throughput Assay to Identify HSV-1 ICP0 Transactivation**

2 **Inhibitors**

3

4 Cindy Y. Ly<sup>1</sup>, Chunmiao Yu<sup>1</sup>, Peter McDonald<sup>2</sup>, Anuradha Roy<sup>2</sup>, David Johnson<sup>3</sup>, David J.

5 Davido<sup>1\*</sup>

6

7 <sup>1</sup>Department of Molecular Biosciences, The University of Kansas, Lawrence, KS 66045

8 <sup>2</sup>High Throughput Screening Laboratory, The University of Kansas, Lawrence, KS 66047

9 <sup>3</sup>Computational Chemical Biology Core, The University of Kansas, Lawrence, KS 66047

10

11 \*Corresponding Author. Department of Molecular Biosciences, University of Kansas, Lawrence,

12 Kansas, United States of America. Phone: (785) 864-4022. Email: [ddavido@ku.edu](mailto:ddavido@ku.edu)

13

14

15

16

17

18

19

20

21

22

23

24

25

26

27 **Abstract**

28

29 Herpes simplex virus 1 (HSV-1) is a ubiquitous virus that results in lifelong infections due to it's  
30 ability to cycle between lytic replication and latency. As an obligate intracellular pathogen, HSV-  
31 1 exploits host cellular factors to replicate and aid in its life cycle. HSV-1 expresses infected cell  
32 protein 0 (ICP0), an immediate-early regulator, to stimulate the transcription of all classes of viral  
33 genes via its E3 ubiquitin ligase activity. Mechanisms by which ICP0 activates viral gene  
34 expression and the cellular factors involved are largely unknown. Here we report an automated,  
35 inexpensive, and rapid high-throughput approach to examine the effects of small molecule  
36 compounds on ICP0 transactivator function in cells. Two HSV-1 reporter viruses, KOS6 $\beta$  (wt) and  
37 *dlx3.1-6 $\beta$*  (ICP0-null mutant), were used to monitor ICP0 transactivation activity through the HSV-  
38 1 ICP6 promoter::*lacZ* expression cassette. A  $\geq 10$ -fold difference in  $\beta$ -galactosidase activity was  
39 observed in cells infected with KOS6 $\beta$  compared to *dlx3.1-6 $\beta$* , demonstrating that ICP0 potently  
40 transactivates the ICP6 promoter. We established the robustness and reproducibility with a Z'-  
41 factor score of  $\geq 0.69$ , an important criterium for high-throughput analyses. Approximately 19,000  
42 structurally diverse compounds were screened and 76 potential inhibitors of the HSV-1  
43 transactivator ICP0 were identified. We expect this assay will aid in the discovery of novel  
44 inhibitors and tools against HSV-1 ICP0. Using well-annotated compounds could identify potential  
45 novel factors and pathways that interact with ICP0 to promote HSV-1 gene expression.

46

47 **Keywords:** herpes simplex virus 1, infected cell protein 0, high-throughput assay

48

49

50

51

52

53 **1. Introduction**

54

55 Herpes simplex virus 1 (HSV-1) infects ~80% of the world's population. HSV-1 is the major cause  
56 of recurrent oral-facial sores and can give rise to severe diseases such as herpes stromal keratitis  
57 and encephalitis (Roizman et al., 2007). HSV-1 cycles between two phases of its life cycle: lytic  
58 and latent infection. At first exposure, the virus productively replicates in the epithelial and  
59 fibroblast cells at the periphery and then travels along the axons of the sensory nerves that  
60 innervate these sites to establish latency in the trigeminal ganglion (Bloom, 2016). Latency is the  
61 lack of infectious virions but continued presence of the HSV-1 genome. Various stressors trigger  
62 the latent virus to lytically reactivate and may lead to recurrent symptoms, persisting as a lifelong  
63 infection. Given that HSV-1 is an obligate intracellular pathogen, cellular factors play an important  
64 role in replication and reactivation (Grinde, 2013).

65

66 Current treatments remain limited to targeting HSV-1 lytic infection and viral DNA replication. First  
67 line therapeutics include acyclic guanosine analogues such as acyclovir and valacyclovir, which  
68 upon phosphorylation by HSV thymidine kinases selectively inhibits viral DNA polymerase  
69 (Vadlapudi et al., 2013; Wilson et al., 2009). The lifelong use of these drugs has led to viral  
70 resistance (Piret and Guy, 2011). Second line therapeutics, cidofovir and foscarnet, are limited in  
71 their use due to nephrotoxicity (Wilson et al., 2009). Therefore, it is essential to identify inhibitors  
72 of novel targets that block HSV-1 lytic infection and reactivation.

73

74 We focused on infected cell protein 0 (ICP0), an immediate-early viral protein of HSV-1. ICP0  
75 transactivates all three classes of HSV-1 genes, in part, through the destabilization and/or  
76 inhibition of host factors. ICP0 utilizes its RING-finger domain for E3 ubiquitin ligase activity  
77 targeting specific cellular proteins by conjugating them with ubiquitin, a post-translational  
78 modification (Everett, 2000; Boutell et al., 2002). Ubiquitin-mediated degradation of cellular

79 proteins by ICP0 leads to the disruption of nuclear domain 10 (ND10), affecting cellular  
80 proliferation and differentiation, senescence, and apoptosis (Cai et al., 1993; Ching *et al.*, 2005;  
81 Zhong S *et al.*, 2000). Two ND10 constituent proteins, promyelocytic leukemia protein (PML) and  
82 Sp100, are degraded by ICP0, which inactivates the antiviral properties of ND10s (Everett et al.,  
83 1998; Muller and Dejean, 1999, Lanfranca et al., 2014).

84  
85 Genetic studies have shown that ICP0-null mutants are reduced for viral replication compared to  
86 wild type HSV-1 strains, demonstrating that ICP0 promotes efficient viral replication in cell culture  
87 and animal models of HSV-1 infection (Sacks and Schaffer, 1987; Leib et al., 1989, Halford and  
88 Schaffer, 2000; Everett, 1989; Everett et al., 2009; Stow and Stow, 1986). Animal studies have  
89 demonstrated that ICP0 enhances the establishment of viral latency and significantly stimulates  
90 viral reactivation (Halford and Schaffer, 2001; Halford *et al.*, 2006; Cai *et al.*, 1993). Given this  
91 pivotal role of ICP0 in the HSV-1 life cycle, mechanisms by which ICP0 functions and the cellular  
92 pathways that it alters remain to be identified (Smith et al., 2011; Hagglund and Roizman, 2004;  
93 Boutell and Everett, 2013). Genetic and cell-based assays have led to the discovery of ICP0-  
94 host interactions, but chemical biological approaches to examine these interactions have been  
95 limited.

96  
97 We developed a novel approach to examine HSV-1's ICP0 transactivator function and identify  
98 potential inhibitors of HSV-1 ICP0. Our approach utilizes two reporter viruses, KOS6 $\beta$  (Davido et  
99 al., 2002) and *dlx3.1-6 $\beta$*  (Davido et al., 2003). KOS6 $\beta$  (wt) and *dlx3.1-6 $\beta$*  (an ICP0-null mutant)  
100 have an ICP6 promoter::lacZ cassette inserted between UL49 and UL50 genes. Notably, ICP0 is  
101 observed to be a potent and specific inducer of the early ICP6 gene, which encodes the large  
102 subunit of ribonucleotide reductase (Davido and Leib, 1996; Davido et al., 2002; Sze and Herman,  
103 1992; Goldstein and Weller, 1998). ICP0 transactivation activity can be monitored using a  
104 simple colorimetric-based  $\beta$ -galactosidase activity assay. This assay provides an inexpensive

105 and automated high-throughput screening method. We conducted an initial screen with  
106 roscovitine, a broad inhibitor of cyclin-dependent kinases (cdks) and HSV-1 transcription, to  
107 validate the sensitivity, robustness, and reproducibility of our assay.

108  
109 Our assay was used in a pilot study that screened ~19,000 compounds, and we identified 76 hits  
110 as potential ICP0 transactivator inhibitors, which included clusters of trichothecenes, lipopeptides,  
111 and cdk inhibitors. Some of the compounds in these clusters have been previously shown to  
112 impair HSV-1 replication, confirming the utility of our screen. Implications of our system are  
113 discussed.

114

## 115 **2. Materials and Methods**

### 116 *2.1 Cell culture, viruses, and compounds*

117 HepaRG cell line is derived from a liver tumor patient (Gripon et al., 2002). HepaRG cells (a gift  
118 from Roger Everett) were grown in William's E Medium containing 10% fetal bovine serum  
119 (FBS), 2mM L-glutamine, 10 U/mL penicillin, 10 U/mL Streptomycin, 50 µg/mL Insulin, and 50  
120 µM Hydrocortisone. HepaRG cells were maintained by incubation at 37°C in 5% CO<sub>2</sub>. Reporter  
121 viruses, HSV-1 KOS6β (wt) and *dlx3.1-6β* (ICP0-null mutant), were used in our assays and titer  
122 as previously described (Davido et al., 2002; Davido et al., 2003). The cdk inhibitor, roscovitine,  
123 was prepared in dimethyl sulfoxide (DMSO) at a stock concentration of 50 mM (Schang et al.,  
124 1998). The final concentrations of roscovitine were 50 µM and 100 µM.

125

### 126 *2.2 Optimization of high-throughput assay*

127 To optimize our assay, we examined the variables of fetal bovine serum (FBS) percentage,  
128 multiplicity of infection (MOIs), infection period, β-galactosidase assay kinetics and stability.  
129 HepaRG cells were seeded in 384-wells-plates, 25 µL of 6,750 cells per well, in phenol red-free

130 William's E Medium containing either 1% or 2% FBS, and incubated for 24 hours at 37°C in 5%  
131 CO<sub>2</sub>. Then, 10 µl of KOS-6β or dIx3.1-6β were added to wells at MOIs equivalent to 0, 0.2, 1, and  
132 5. Infections proceeded for 6, 12, or 24 hours. At each time point, 10 µl of 1X lysis buffer (1%  
133 Triton X-100; 20 mM Tris-HCl [pH 8.0]; 150 mM NaCl; 1 mM dithiothreitol) was added to each well  
134 and incubated at 37°C for 20 minutes. A 4.5X β-Gal Assay buffer/CPRG solution was made with  
135 Chlorophenol Red-β-D-galactopyranoside (CPRG) (Calbiochem) and 4.5X β-Gal Assay buffer  
136 (2.475 mL 1M KCl; 19.8 mL 1M Phosphate buffer (pH 7.3); 225 µL 1M MgCl<sub>2</sub>; 1.984 mL of 14.4  
137 M BME; H<sub>2</sub>O to 50 mL). The 4.5X β-Gal Assay buffer/CPRG solution was added to each well (10  
138 µl/well) with a final concentration of 1 mg/mL. Absorbance was measured at 595nm at 5, 35, 80,  
139 120, 1080 minutes post-addition of the β-Gal/CPRG solution with a PerkinElmer EnVision reader.  
140

### 141 *2.3 Primary screen with roscovitine*

142 A primary screen was conducted using roscovitine (positive control) with optimized conditions  
143 (Fig. 3). HepaRG cells were seeded in 384-wells-plates and incubated for 24 hours at 37°C in 5%  
144 CO<sub>2</sub>. Roscovitine was then transferred into each well echo 555 acoustically (Labcyte Inc.) and  
145 preincubated for 40 minutes at 37°C in 5% CO<sub>2</sub>. Reporter viruses, KOS-6β and dIx3.1-6β were  
146 dispensed at MOI 5 and processed as described in section 2.2. For studying compound effects  
147 on cell viability, HepaRG cells were treated with roscovitine for 12 hours. An ATP-based cell  
148 viability assay was performed using Promega Cell-Titer Glo reagent according to manufacturer's  
149 instructions. GraphPad Prism 8 was used to determine IC<sub>50</sub> and CC<sub>50</sub>.

150

### 151 *2.4 Screen with KU-HTLS libraries and cell cytotoxicity*

152 HepaRG cells were seeded as previously described in 2.3. Each compound from the KU-HTLS  
153 was transferred by echo 555 acoustically into each well for a final concentration of 10 µM. The  
154 libraries included Selleck Bioactives, Natural Products (GreenPharma), CMLD Diversity,

155 Analyticon Natural Products, Life Natural Products. Each compound was preincubated for 40  
156 minutes at 37°C in 5% CO<sub>2</sub>. Then reporter viruses, KOS-6β and d/λ3.1-6β, were dispensed at an  
157 MOI 5 per well, and processed as described in section 2.2. To eliminate compounds that are  
158 potential false positive hits based on cytotoxicity we used Promega Cell-Titer Glo reagent  
159 according to manufacturer's instructions. Each compound was incubated at 10 μM for 12 hours  
160 prior to read.

161  
162 *2.5 Cycloheximide block and release*  
163 HepaRG cells were seeded as previously described in 2.3. Cycloheximide (CHX), protein  
164 synthesis inhibitor, was transferred into each well for a final concentration of 50 μg/mL and  
165 incubated for 1 hour. Then, KOS-6β and d/λ3.1-6β were dispensed at an MOI 5 per well. After 4  
166 hours post infection, virus and CHX was washed off with phosphate-buffer saline twice. Complete  
167 Williams E media was added to each well and the compounds were transferred by echo 555  
168 acoustically into each well for a final concentration of 10 μM. After 20 hours of incubation, each  
169 well was processed as described in section 2.2.

170  
171 *2.6 Chemo-informatics screen*  
172 The hits from the initial screen were clustered using Canvas by Schrodinger (Schrodinger  
173 Release, 2017; Duan et al., 2010; Sastry et al., 2010). MACCS fingerprints were calculated for  
174 each compound. Compounds were clustered using hierarchical clustering and leader-follower  
175 clustering, with various merge distances/cluster radii. Leader-follower clustering of MACCS hits  
176 with a cluster radius of 0.3 yielded visually intuitive clusters.

177  
178  
179

180 **3. Results**

181 *3.1. Assay optimization*

182 We developed a colorimetric cell-based assay to monitor the transactivation activity of ICP0 in a  
183 384-well plate format. The  $\beta$ -galactosidase viral reporter system allows for an automated  
184 colorimetric screen to rapidly process large numbers of compounds. To optimize our screen we  
185 examined several variables: serum levels, MOI, length of infectivity, and longevity of colorimetric  
186 signal, as outlined in **Figure 2**. HepaRG cells, human hepatocytes, was selected for our cell-  
187 based assay because they are easy to culture and are readily infected by HSV-1 (Everett et al.,  
188 2008). To maintain viable growth conditions for HepaRG cells and reduce possible non-specific  
189 binding of viral particles to serum, we tested 2 concentrations (1% or 2%) of fetal bovine serum  
190 (FBS) in our medium. As shown in **Figure 3**, absorbance signals for  $\beta$ -galactosidase activity at  
191 1% and 2% FBS remained  $<0.16$  in absence of virus, demonstrating no effect on  $\beta$ -galactosidase  
192 activity. Our assay utilizes reporter viruses, KOS6 $\beta$  (wt) and *dx3.1-6 $\beta$*  (ICP0-null mutant), that  
193 have an ICP6 promoter::lacZ expression cassette. ICP0 is a specific and potent inducer of ICP6,  
194 allowing us to utilize a  $\beta$ -galactosidase reporter system to monitor ICP0 transactivation activity. In  
195 presence of KOS6 $\beta$  or *dx3.1-6 $\beta$* , the absorbance remained consistent for either virus irrespective  
196 of MOIs or time of infectivity. As 2% FBS did not appear to impact cell viability, we decided to  
197 use media containing 2% FBS in future experiments.

198  
199 We then examined MOIs at 0, 0.2, 1, and 5 PFU/cell to determine the optimal MOI for  $\beta$ -  
200 galactosidase activity signal. With KOS6 $\beta$ , absorbance signals ranged from 0.5 to 1.5, with a MOI  
201 of 5 reaching optimal signal by 24 hours post-infection (hpi). The MOIs of 0.2, 1, and 5 were  
202 clearly differentiated at 12 hours post-infection, irrespective of FBS concentration. By 24 hpi  $\beta$ -  
203 galactosidase levels of cells infected at MOIs of 0.2 and 1 began to approach those samples with  
204 an MOI of 5. For *dx3.1-6 $\beta$*  infections at the lower MOIs (i.e., 0.2 and 1.0), the absorbance was  
205 at background levels, regardless of the infection time point. A reproducible increase in



206 absorbance (2-3-fold) at an MOI of 5 by 24 hpi was observed compared to mock-infected cells.  
207 These data indicate that ICP0 strongly transactivates the ICP6 promoter of HSV-1, mirroring  
208 results from other published reports. We ultimately used an of MOI of 5, as it gave the highest  
209 signal relative to the background control for both reporter viruses.

210

211 The kinetics of  $\beta$ -galactosidase activity for all groups were analyzed at 6, 12, and 24 hpi. For  
212 KOS6 $\beta$ ,  $\beta$ -galactosidase expression was noticeably detected at 6 hpi for all MOIs, with  
213 absorbance values showing marginal to substantial increases by 12 and 24 hpi. 24 hpi was  
214 selected as optimal infection time point, as maximal  $\beta$ -galactosidase activities were observed with  
215 the reporter viruses at an MOI of 5.

216

217 Lastly, we analyzed the stability of  $\beta$ -galactosidase assay after stop solution was added and  
218 absorbance read 5, 35, 80, 120, and 1080 minutes later. There appeared to be no visible  
219 differences in the absolute absorbance values between time points relative to the MOI used or  
220 time of infection. Given the stability of  $\beta$ -galactosidase activities, all subsequently assays were  
221 read 1080 minutes after stop solution was added. In summary, we selected the optimized  
222 conditions of 2% FBS, MOI of 5, 24 hpi, and 1080 minutes plate reads for our reporter assays.

223

### 224 *3.2. Assay validation: primary screen with roscovitine*

225 After establishing our final conditions, this assay was initially validated in a screen setting.  
226 Roscovitine, a broad cdks inhibitor, blocks the expression of many HSV-1 genes. Consequently,  
227 roscovitine was used as a positive control to validate the inhibition of HSV-1 gene expression in  
228 our reporter assay. Cells were pre-treated for 40 minutes with roscovitine over a range of  
229 concentrations. As shown in **Figure 5**, a sigmoidal-dose response was obtained for inhibition of  
230 roscovitine against the two HSV-1 reporter viruses. Roscovitine showed an inhibitory

231 concentration of 50% (IC<sub>50</sub>) at 17.39  $\mu$ M for KOS6 $\beta$  and 8.18  $\mu$ M for *dx3.1-6 $\beta$* . Approximately  
232 50% loss of cell viability was observed with 100  $\mu$ M roscovitine.

233

### 234 *3.3. Assay robustness and reproducibility*

235 This assay was tested for its robustness and reproducibility to be used in screening libraries of  
236 small molecule inhibitors. With KOS6 $\beta$ , roscovitine at 50  $\mu$ M and 100  $\mu$ M had a 3.75- and 9.3-  
237 fold reduction in  $\beta$ -galactosidase activity, respectively, compared with untreated controls (**Figure**  
238 **6**). This validates the sensitivity of our assay with the use of a known small molecule inhibitor of  
239 HSV-1 gene expression. Furthermore, wells only containing the reporter virus, KOS6 $\beta$ , exhibited  
240 a low absorbance signal ( $0.16 \pm 0.014$ ), whereas wells infected with KOS6 $\beta$  and treated with  
241 roscovitine reached an average Abs of  $0.8 \pm 0.048$  and  $0.32 \pm 0.042$  at 50  $\mu$ M and 100  $\mu$ M  
242 concentrations, respectively. To assess the quality of the high-throughput assay the Z',  
243 screening window coefficient was calculated (**Figure 6**). The Z' score is a statistical indicator of  
244 assay quality, measuring assay signal dynamic range, data variation associated with sample  
245 measurement, and data variation associated with reference controls. A score between 0.5 and 1  
246 indicates suitability of assay for high throughput screening (Zhang et al., 1999). The Z'-factor for  
247 all samples were above  $\geq 0.69$ , indicative of good separation of the positive and negative  
248 controls in our assay.

249

### 250 *3.4 Screen with KU-HTLS: pilot screen and secondary screen*

251 We employed our high-throughput assay and screened ~19,000 compounds from the High  
252 Throughput Screening Laboratory at the University of Kansas (KU-HTSL). The KU-HTSL is a  
253 collection of diverse small molecules with unique scaffolds from several commercial vendors.  
254 The small molecule compounds screened included bioactive FDA approved inhibitors, natural  
255 product scaffolds amenable to chemical synthesis, purified drug-like compounds, and purified

256 secondary metabolites. The screen of ~19,000 compounds at 10  $\mu$ M resulted in a hit rate of  
257 4.6%, 840 compounds, focusing on compounds above 3 standard deviations from the plate  
258 median. To eliminate false positives due to cytotoxicity of the compounds, ATP levels were  
259 measured for cell viability. The cytotoxicity assay reduced the number of hits to 349 compounds,  
260 hit rate of 1.9%. To help assess if the compounds are directly or indirectly blocking ICP0  
261 transactivation activity we employed a secondary assay, a cycloheximide (CHX) block and  
262 release. CHX blocks protein synthesis and allows ICP0 transcripts to accumulate. At 4 hpi, the  
263 CHX block is released and each compound is added when ICP0 protein is expressed. The  
264 secondary assay resulted in 76 final hits, a 0.4% hit rate, which helped focus our efforts on  
265 specific compounds. We then utilized a chemo-informatic approach (Canvas by Schrodinger) to  
266 cluster compounds based on chemical structure and filter-out compounds that are potentially  
267 promiscuous or reactive. This resulted in 42 clusters, including singletons, and eliminated 6 hits  
268 flagged as pan-assay interference compounds (PAINS).

269

#### 270 *3.4.1 Clusters & singletons: trichothecenes, lipopeptides, and cyclin-dependent kinases*

271 One cluster of 10 compounds were identified to be a family of trichothecenes, secondary  
272 metabolites, produced by fungi. Trichothecenes are a class of sesquiterpenes and a few of  
273 these compounds were examined with HSV. Previous studies have shown the inhibitory effect  
274 of trichothecenes may be due to the binding of the compound to the polyribosomes, inhibiting  
275 viral protein synthesis (Tani et al., 1995; Okazaki et al., 1992; Okazaki et al., 1988). Another  
276 cluster resulted in two compounds of cyclic lipopeptides, biosurfactants produced by *Bacillus*  
277 *subtilis*. A previous study showed treatment with one of these lipopeptides reduced HSV-1 titers  
278 by >25,000-fold (Vollenbroich et al., 1997).

279

280 Several singletons, unique chemical structures, were pan-cdk inhibitors. Cellular cdks have  
281 been shown to be required for HSV-1 replication and transcription, regulating ICP0 function

282 (Schang et al., 1998; Davido et al., 2003; Davido et al., 2002). One hit compound we identified,  
283 a known cdk-7 and -9 inhibitor, was shown to inhibit expression of all immediate-early genes  
284 including ICP0 (Hou et al., 2017). Overall, the previously studied hits (**Figure 7**) are proof of  
285 concept that our high-throughput assay is capable of identifying inhibitors of HSV-1. In future  
286 studies, we will examine the novel compounds and inhibitors identified from our library screen to  
287 determine the extent and mechanism of HSV-1 and ICP0 inhibition.

288

#### 289 **4. Discussion**

290 ICP0 is a crucial viral regulatory protein that can dictate lytic infection or latency during an HSV-  
291 1 infection. We and others have demonstrated that ICP0 is a potent transactivator to all classes  
292 of HSV-1 genes, stimulating viral infection and reactivation. ICP0 is an attractive target for the  
293 development of novel antiherpetics, and such antivirals would be expected to limit HSV-1 lytic  
294 infection from reactivation. To date, identification of compounds that specifically inhibit ICP0 are  
295 limited.

296

297 To achieve this goal, we established a chemical-biological assay utilizing HSV-1 reporter viruses  
298 that allowed us to monitoring ICP0 transactivation function in tandem with small molecule  
299 compounds. Our optimization experiments led us to select the conditions of 2% FBS, MOI of 5 for  
300 the reporter viruses, 24 hpi, and measuring  $\beta$ -galactosidase 1080 minutes after the addition of  
301 stop solution. The assay achieved a robust and reproducible Z'-factor of  $\geq 0.69$  for various  
302 controls, which meets high throughput screening criteria. The sensitivity and effectiveness of the  
303 reporter system was validated using the broad cdk inhibitor, roscovitine, which displayed a dose-  
304 dependent response with the reporter viruses. Overall, this method was optimized to produce  
305 consistent and reproducible measurements for monitoring ICP0 transactivating activity in a high-  
306 throughput approach.

307

308 Our system described confers several advantages over other assays. One is the simplicity of the  
309 assay, where all components are added directly to the 384-well plate, requiring minimal handling  
310 of the samples and practically all steps are automated. The reporter viruses provide another  
311 advantage, as the lacZ gene enables for a simple, inexpensive, and direct colorimetric screen for  
312  $\beta$ -galactosidase activity. Previous assays utilized radioactive substrates or expensive equipment  
313 in fluorescent-based assays (Sekulovich *et al.*, 1988); our approach eliminates those potential  
314 issues. Additionally, this assay provides a rapid and feasible method to screen multiple libraries  
315 of small molecule compounds in a 384-well plate format, which require small amounts of  
316 compounds for testing that are in micromolar range. Lastly, our high-throughput assay has the  
317 potential to be used in combination with other genetic screens (e.g., CRISPR/Cas9) to identify  
318 novel cellular factors involved in HSV-1 replication. Future work will be focused on determining  
319 how several of the 76 hits we identified in our screen inhibit HSV-1.

320

## 321 **5. Acknowledgements**

322

323 This work was supported by the University of Kansas (D.J.D.) and grant P20GM113117 from the  
324 National Institutes of Health (NIH) COBRE, Chemical Biology of Infectious Disease (D.J.D.).  
325 Cindy Ly was supported by the NIH Graduate Training Program in the Dynamic Aspects of  
326 Chemical Biology (T32GM008545). We thank Tom Prisinzano for assistance with chemo-  
327 informatics and members of the Davido lab for input related to this study. The content of this  
328 article is solely the responsibility of the authors and does not necessarily represent the official  
329 views of the NIH.

330

331

332

333

334

## 335 **Figure Legends**

336 **Figure 1. Diagram of reporter viruses.** The background strain used in this approach is KOS, an  
337 HSV-1 wt strain (not drawn to scale), with unique long ( $U_L$ ) and unique short ( $U_S$ ) regions of the  
338 genome flanked by an inverted repeat sequences (ab  $U_L$  b'a' and a'c'  $U_S$  ca). Two arrows  
339 represent ICP0 which contains two copies in the HSV-1 genome, and ICP0 is a specific inducer  
340 of ICP6. The reporter viruses KOS6 $\beta$  and *dlx3.1-6 $\beta$*  both contain a ICP6 promoter fused with a  
341 lacZ reporter gene cassette inserted between the UL49 and UL50 genes of HSV-1. *dlx3.1-6 $\beta$* , an  
342 ICP0-null mutant, has a 3.1 kb deletion in both copies of ICP0 gene. This figure is adapted from  
343 Davido, *et al.*, 2003.

344

345 **Figure 2. Schematic of optimization assay.** Serum percentage, multiplicity of infection (MOI),  
346 infection period, and  $\beta$ -galactosidase stability. Schematic of optimization process: 6,750 HepaRG  
347 cells were seeded in each well of 384-well plates with 1% or 2% FBS, incubated at 37°C in 5%  
348 CO<sub>2</sub> for 24 hours. Cells were then infected with KOS6 $\beta$  or *dlx3.1-6 $\beta$*  at MOIs of 0, 0.2, 1, and 5.  
349  $\beta$ -galactosidase levels were analyzed at 6 hpi, 12 hpi, and 24 hpi using CPRG.  $\beta$ -galactosidase  
350 stability was examined at 5, 35, 80, 120, 1080 minutes. (Further description of assay is described  
351 in Methods section.)

352

353 **Figure 3. Optimization results.** Histograms show optimization results of: (A) KOS6 $\beta$  infection  
354 and (B) *dlx3.1-6 $\beta$*  infection. For each reporter virus the data compares: 1% or 2% FBS, MOIs: 0,  
355 0.2, 1, and 5, and  $\beta$ -galactosidase levels at 6 hpi, 12 hpi, and 24 hpi using CPRG, and assay  
356 stability from 5 to 1080 minutes.

357

358 **Figure 4. Schematic of Primary Screen.** The assay used 2% of FBS, 5 PFU/cell for both reporter  
359 viruses, and 24 hpi. The approach was tested on a known small molecule inhibitor of HSV gene

360 expression, roscovitine, as a positive control and the negative control, DMSO (0.6%). This  
361 approach was also used to screen multiple compound libraries.

362

363 **Figure 5. Inhibition of  $\beta$ -galactosidase activity from reporter viruses by roscovitine.** To

364 confirm the activity of roscovitine in our assay, dose-dependent responses to  $\beta$ -galactosidase  
365 expression and cytotoxicity were measured.

366

367 **Figure 6. Well plate uniformity.** Scatterplot of 16 wells examining in samples containing

368 KOS6 $\beta$ , cells and KOS6 $\beta$  and DMSO (0.6%), KOS6 $\beta$ -infected cells plus roscovitine (50  $\mu$ M), or

369 KOS6 $\beta$ -infected cells plus roscovitine (100  $\mu$ M). The average and standard deviation from each

370 sample was measured to calculate the Z' score.

371

372 **Table 1. Select hits from KU-HTLS screen.** The optimized high-throughput assay was utilized

373 to screen 19,000 diverse compounds from the KU-HTLS. After application of the primary and

374 secondary screens, we had 76 final hits (KU-identifiers). From these hits, we identified a family of

375 trichothecenes, two lipopeptides and several cdk inhibitors (with KU identifiers) as potent

376 inhibitors in our assay.

377

378

379

380

381

382

383

384

385

386 **Figures**

387 Figure 1.

388

389

390

391

392

393

394

395

396

397

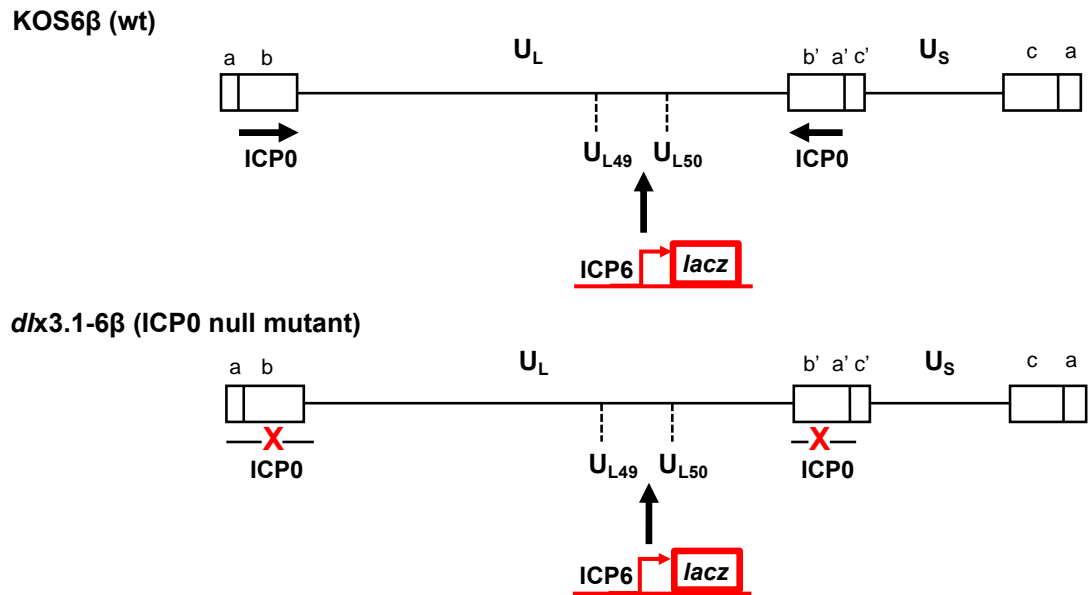

398 Figure 2.

399

400

401

402

403

404

405

406

407

408

409

410

411

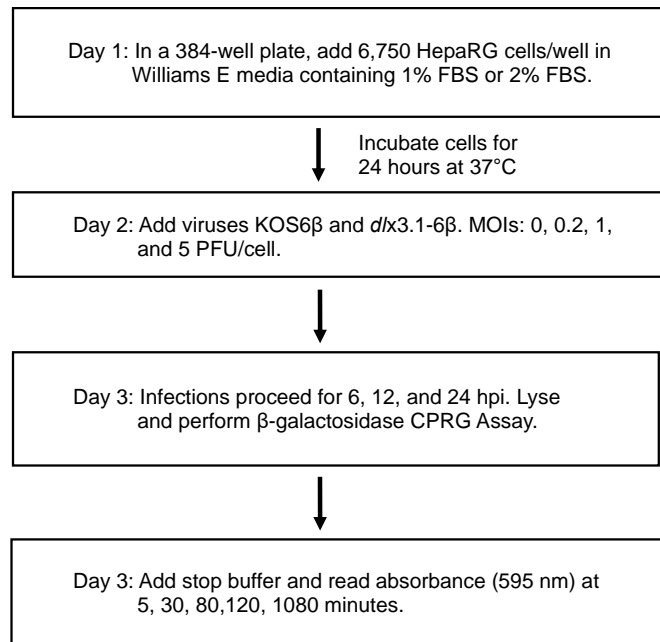



412 Figure 3.

413

414

415

416

417

418

419

420

421

422

423

424

425

426

427 Figure 4.

428

429

430

431

432

433

434

435

436

437

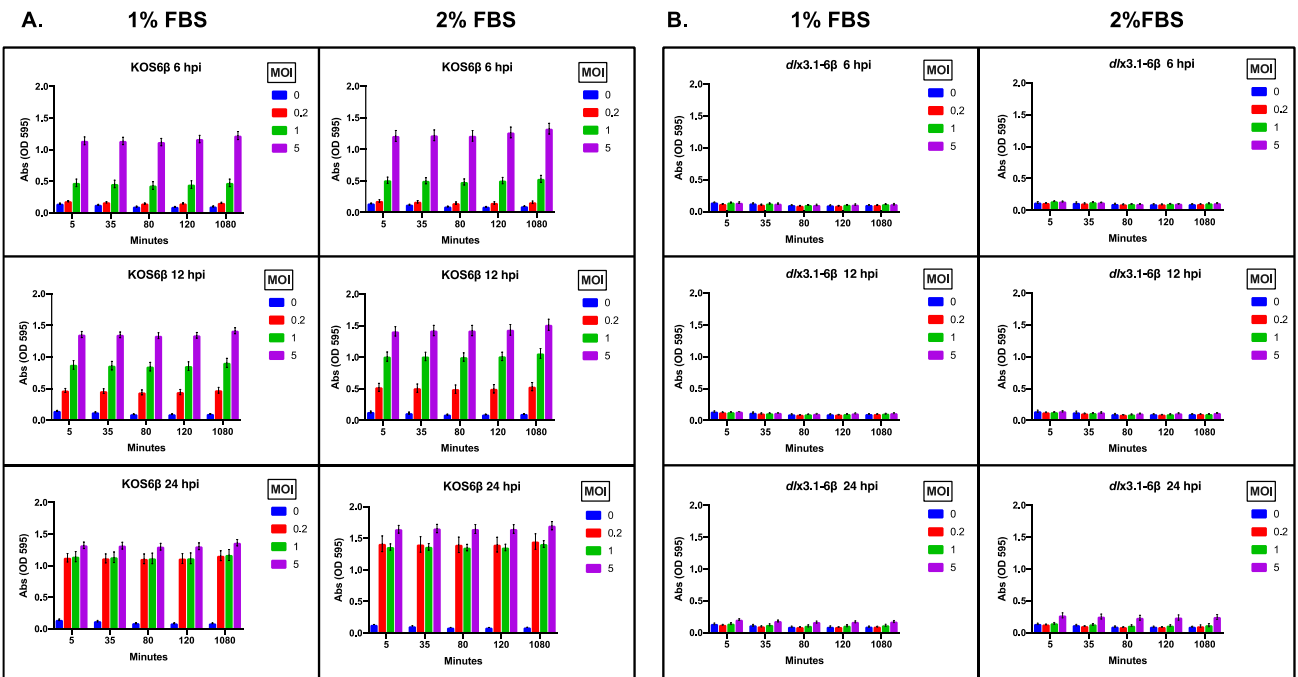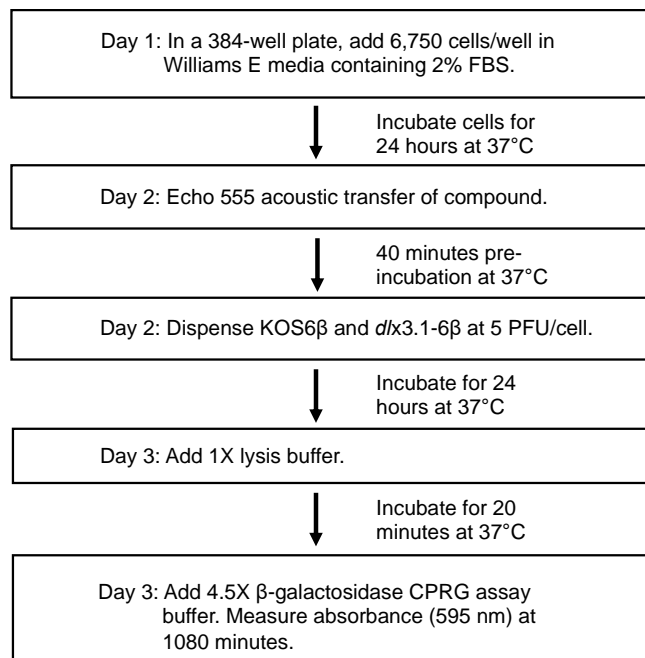

438 Figure 5.

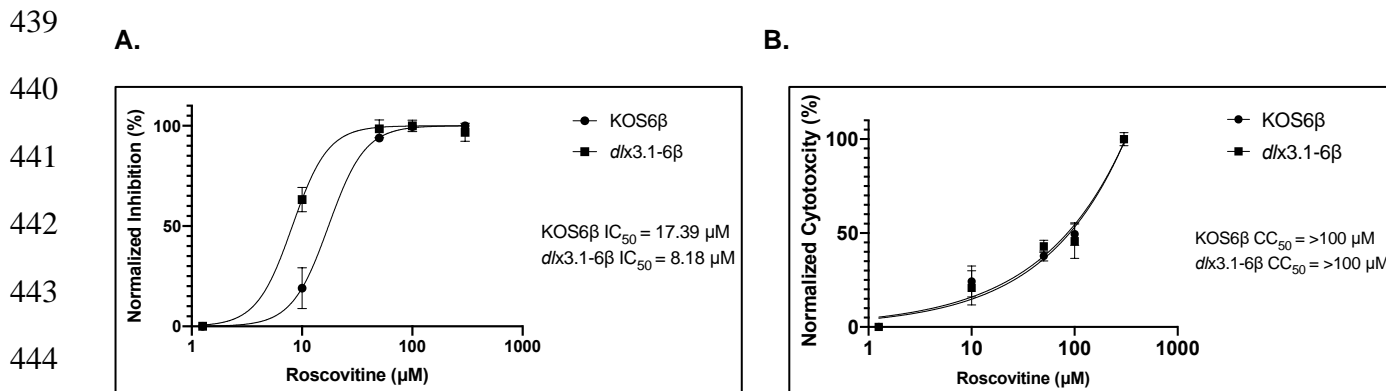

445

446 Figure 6.

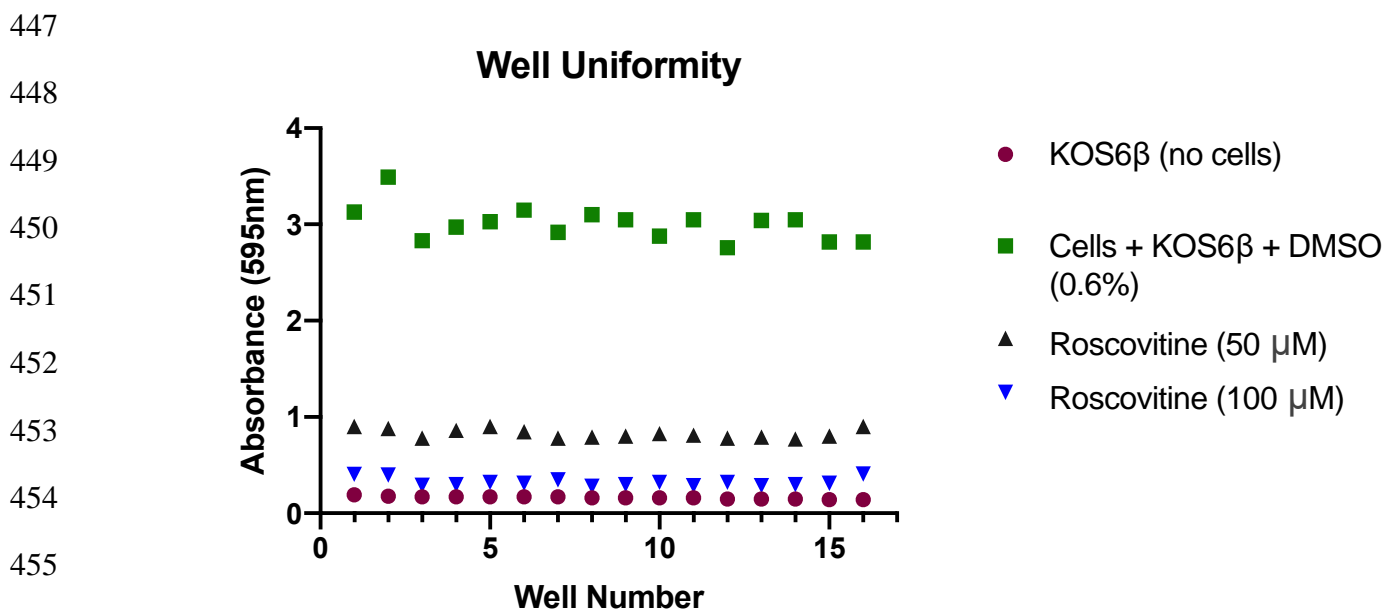

456

457

458

459

460

461

462

463

| Sample                             | Average | Standard Deviation | Z'   | Number of wells |
|------------------------------------|---------|--------------------|------|-----------------|
| KOS6 $\beta$ (no cells)            | 0.16    | 0.014              | 0.79 | 16              |
| Cells + KOS6 $\beta$ + DMSO (0.6%) | 3.01    | 0.170              | -    | 16              |
| Roscovitine (50 $\mu\text{M}$ )    | 0.80    | 0.048              | 0.69 | 16              |
| Roscovitine (100 $\mu\text{M}$ )   | 0.32    | 0.042              | 0.75 | 16              |

464 Table 1.

465

466

467

468

469

470

471

472

473

474

475

476

477

478

479

480

481

482

483

484

485

486

487

488

489

| <b>Compounds</b>                          | <b>Percent Inhibition in Primary Screen</b> | <b>Percent Inhibition in Secondary Screen</b> |
|-------------------------------------------|---------------------------------------------|-----------------------------------------------|
| <b>Trichothecenes</b>                     |                                             |                                               |
| KU0188522                                 | 100                                         | 99                                            |
| KU0280950                                 | 93                                          | 95                                            |
| KU0281790                                 | 100                                         | 99                                            |
| KU0281792                                 | 99                                          | 99                                            |
| KU0282448                                 | 90                                          | 91                                            |
| KU0283070                                 | 100                                         | 99                                            |
| KU0283235                                 | 98                                          | 99                                            |
| KU0283795                                 | 97                                          | 97                                            |
| KU0283847                                 | 101                                         | 100                                           |
|                                           |                                             |                                               |
| <b>Lipopeptides</b>                       |                                             |                                               |
| KU0283335                                 | 100                                         | 99                                            |
| KU0283824                                 | 100                                         | 94                                            |
|                                           |                                             |                                               |
| <b>Cyclin-Dependent Kinase Inhibitors</b> |                                             |                                               |
| KU0191030                                 | 97                                          | 96                                            |
| KU0190175                                 | 90                                          | 95                                            |
| KU0190205                                 | 94                                          | 96                                            |
| KU0189256                                 | 99                                          | 97                                            |
| KU0190358                                 | 99                                          | 95                                            |
| KU0190362                                 | 98                                          | 96                                            |

## References

- 491 1. Roizman B., et al. Herpes simplex viruses. Fields Virology. ed 6. Philadelphia: Lippincott  
492 Williams & Wilkins; 2013. pp. 1823–1897.
- 493 2. Bloom, DC. Alpha herpesvirus latency: a dynamic state of transcription and  
494 reactivation. *Adv Virus Res.* 2016;94:53–80.
- 495 3. Grinde, Bjørn. “Herpesviruses: Latency and Reactivation – Viral Strategies and Host  
496 Response.” *Journal of Oral Microbiology*, vol. 5, no. 1, 2013, p. 22766.,  
497 doi:10.3402/jom.v5i0.22766.
- 498 4. Vadlapudi, Aswani D et al. “Update on emerging antivirals for the management of herpes  
499 simplex virus infections: a patenting perspective.” *Recent patents on anti-infective drug*  
500 *discovery* vol. 8,1 (2013): 55-67. doi:10.2174/1574891x11308010011
- 501 5. Wilson, S et al. “Novel approaches in fighting herpes simplex virus infections.” *Expert*  
502 *review of anti-infective therapy* vol. 7,5 (2009): 559-68. doi:10.1586/eri.09.34
- 503 6. Piret, Jocelyne, and Guy Boivin. “Resistance of herpes simplex viruses to nucleoside  
504 analogues: mechanisms, prevalence, and management.” *Antimicrobial agents and*  
505 *chemotherapy* vol. 55,2 (2011): 459-72. doi:10.1128/AAC.00615-10
- 506 7. Smith, M., et al. “HSV-1 ICP0: Paving the Way for Viral Replication.” *Future Virology*,  
507 vol. 6, no. 4, 2011, pp. 421–429., doi:10.2217/fvl.11.24.
- 508 8. Everett, R D. “ICP0 induces the accumulation of colocalizing conjugated  
509 ubiquitin.” *Journal of virology* vol. 74,21 (2000): 9994-10005. doi:10.1128/jvi.74.21.9994-  
510 10005.2000
- 511 9. Boutell, Chris et al. “Herpes simplex virus type 1 immediate-early protein ICP0 and is  
512 isolated RING finger domain act as ubiquitin E3 ligases in vitro.” *Journal of virology* vol.  
513 76,2 (2002): 841-50. doi:10.1128/jvi.76.2.841-850.2002
- 514 10. Cai W., et al. The herpes simplex virus type 1 regulatory protein ICP0 enhances virus  
515 replication during acute infection and reactivation from latency. *J*  
516 *Virology*. 1993;67(12):7501–7512
- 517 11. Ching RW, et al. 2005. PML bodies: a meeting place for genomic loci. *J. Cell*  
518 *Sci.* 118:847–854
- 519 12. Zhong S., et al. 2000. The transcriptional role of PML and the nuclear body. *Nat. Cell*  
520 *Biol.* 2:E85–E90
- 521 13. Zhong S., et al. 2000. Promyelocytic leukemia protein (PML) and Daxx participate in a  
522 novel nuclear pathway for apoptosis. *J. Exp. Med.* 191:631–640
- 523 14. Everett RD, et al. The disruption of ND10 during herpes simplex virus infection  
524 correlates with the Vmw110- and proteasome-dependent loss of several PML  
525 isoforms. *J Virol.* 1998;72(8):6581–6591.
- 526 15. Muller S., Dejean A. Viral immediate-early proteins abrogate the modification by SUMO-  
527 1 of PML and Sp100 proteins, correlating with nuclear body disruption. *J*  
528 *Virology*. 1999;73(6):5137–5143.
- 529 16. Lanfranca, M., et al. “HSV-1 ICP0: An E3 Ubiquitin Ligase That Counteracts Host  
530 Intrinsic and Innate Immunity.” *Cells* vol. 3,2 438-54. 20 May. 2014,  
531 doi:10.3390/cells3020438
- 532 17. Sacks, W R, and P A Schaffer. “Deletion mutants in the gene encoding the herpes  
533 simplex virus type 1 immediate-early protein ICP0 exhibit impaired growth in cell  
534 culture.” *Journal of virology* vol. 61,3 (1987): 829-39.
- 535 18. Leib DA, et al. Immediate-early regulatory gene mutants define different stages in the  
536 establishment and reactivation of herpes simplex virus latency. *J Virol.* 1989;63(2):759–  
537 768.

- 538 19. Halford WP, Schaffer PA. Optimized viral dose and transient immunosuppression enable  
539 herpes simplex virus ICP0-null mutants to establish wild-type levels of latency in vivo. *J*  
540 *Virol.* 2000;74(13):5957–5967.
- 541 20. Everett, R. D. 1989. Construction and characterization of herpes simplex virus type 1  
542 mutants with defined lesions in immediate early gene 1. *J. Gen. Virol.* 70:1185-1202
- 543 21. Everett, R.D., et al. “Analysis of the functions of herpes simplex virus type 1 regulatory  
544 protein ICP0 that are critical for lytic infection and derepression of quiescent viral  
545 genomes.” *Journal of virology* vol. 83,10 (2009): 4963-77. doi:10.1128/JVI.02593-08
- 546 22. Stow, N. D., and E. C. Stow. 1986. Isolation and characterization of a herpes simplex  
547 virus type 1 mutant containing a deletion within the gene encoding the immediate early  
548 polypeptide Vmw110. *J. Gen. Virol.* 67:2571-2585.
- 549 23. Halford WP, Schaffer PA. ICP0 is required for efficient reactivation of herpes simplex  
550 virus type 1 from neuronal latency. *J Virol.* 2001;75(7):3240–3249.
- 551 24. Halford WP, Weisend C, Grace J, et al. ICP0 antagonizes Stat 1-dependent repression  
552 of herpes simplex virus: implications for the regulation of viral latency. *Virol J.* 2006;3:44
- 553 25. Hagglund, Ryan, and Bernard Roizman. “Role of ICP0 in the strategy of conquest of the  
554 host cell by herpes simplex virus 1.” *Journal of virology* vol. 78,5 (2004): 2169-78.  
555 doi:10.1128/jvi.78.5.2169-2178.2004
- 556 26. Boutell, Chris, and Roger D Everett. “Regulation of alphaherpesvirus infections by the  
557 ICP0 family of proteins.” *The Journal of general virology* vol. 94,Pt 3 (2013): 465-81.  
558 doi:10.1099/vir.0.048900-0
- 559 27. Davido, D. J., and D. A. Leib. 1996. Role of cis-acting sequences of the ICP0 promoter  
560 of herpes simplex virus type 1 in viral pathogenesis, latency and reactivation. *J. Gen.*  
561 *Virol.* 77:1853–1863.
- 562 Davido, D. J., et al. “The Cyclin-Dependent Kinase Inhibitor Roscovitine Inhibits the  
563 Transactivating Activity and Alters the Posttranslational Modification of Herpes Simplex  
564 Virus Type 1 ICP0.” *Journal of Virology*, vol. 76, no. 3, 2002, pp. 1077–1088.,  
565 doi:10.1128/jvi.76.3.1077-1088.2002.
- 566 28. Davido DJ, Von Zagorski WF, Maul GG, Schaffer PA. The differential requirement for  
567 cyclin-dependent kinase activities distinguishes two functions of herpes simplex virus  
568 type 1 ICP0. *J Virol.* 2003 Dec;77(23):12603-16. doi: 10.1128/jvi.77.23.12603-  
569 12616.2003
- 570 29. Schang, L M et al. “Roscovitine, a specific inhibitor of cellular cyclin-dependent kinases,  
571 inhibits herpes simplex virus DNA synthesis in the presence of viral early  
572 proteins.” *Journal of virology* vol. 74,5 (2000): 2107-20. doi:10.1128/jvi.74.5.2107-  
573 2120.2000
- 574 30. Schrödinger Release 2017-2: Canvas. 2017, Schrödinger LLC: New York, NY.
- 575 31. Duan, J., et al., Analysis and comparison of 2D fingerprints: insights into database  
576 screening performance using eight fingerprint methods. *J Mol Graph Model*, 2010. 29(2):  
577 p. 157-70.
- 578 32. Sastry, M., et al., Large-scale systematic analysis of 2D fingerprint methods and  
579 parameters to improve virtual screening enrichments. *J Chem Inf Model*, 2010. 50(5): p.  
580 771-84.
- 581 33. Everett, Roger D et al. “Replication of ICP0-null mutant herpes simplex virus type 1 is  
582 restricted by both PML and Sp100.” *Journal of virology* vol. 82,6 (2008): 2661-72.  
583 doi:10.1128/JVI.02308-07
- 584 34. Sze, P., and R. C. Herman. 1992. The herpes simplex virus type 1 ICP6 gene is  
585 regulated by a “leaky” early promoter. *Virus Res.* 26:141–152.
- 586 35. Goldstein, D. J., and S. K. Weller. 1988. Herpes simplex virus type 1-induced  
587 ribonucleotide reductase activity is dispensable for virus growth and DNA synthesis:  
588 isolation and characterization of an ICP6 lacZ insertion mutant. *J. Virol.* 62:196–205.

- 589  
590  
591  
592  
593  
594  
595  
596  
597  
598  
599  
600  
601  
602  
603  
604  
605  
606  
607  
608  
609  
610  
611  
612  
613  
614
36. Gripon P., et al (2002). Infection of a human hepatoma cell line by hepatitis B virus. *Proc. Natl. Acad. Sci. USA* 99, 15655-15660.
  37. Zhang, J., et al. "A Simple Statistical Parameter for Use in Evaluation and Validation of High Throughput Screening Assays." *Journal of Biomolecular Screening*, vol. 4, no. 2, Apr. 1999, pp. 67–73, doi:10.1177/108705719900400206.
  38. Tani N., et al. Antiviral activity of trichothecene mycotoxins (deoxynivalenol, fusarenon-X, and nivalenol) against herpes simplex virus types 1 and 2. *Microbiol Immunol.* 1995;39(8):635-7. doi: 10.1111/j.1348-0421.1995.tb02254.x. PMID: 7494505.
  39. Okazaki K., et al. Antiviral activity of metabolites of T-2 toxin against herpes simplex virus type 2. *Biosci Biotechnol Biochem.* 1992 Mar;56(3):523-4. doi: 10.1271/bbb.56.523. PMID: 1369381.
  40. Okazaki, K., et al "Growth Inhibition by Trichothecene Mycotoxins of Herpes Simplex Virus Type 2 and Its Application to Bioassay of the Toxin." *J-STAGE.* 1988, pp.240-241, doi: [https://doi.org/10.2520/myco1975.1988.1Supplement\\_240](https://doi.org/10.2520/myco1975.1988.1Supplement_240)
  41. Vollenbroich D., et al. Mechanism of inactivation of enveloped viruses by the biosurfactant surfactin from *Bacillus subtilis*. *Biologicals.* 1997 Sep;25(3):289-97. doi: 10.1006/biol.1997.0099.
  42. Schang LM, et al. Requirement for cellular cyclin-dependent kinases in herpes simplex virus replication and transcription. *J Virol.* 1998 Jul;72(7):5626-37. doi: 10.1128/JVI.72.7.5626-5637.1998.
  43. Hou, Jue et al. "Antiviral activity of PHA767491 against human herpes simplex virus in vitro and in vivo." *BMC infectious diseases* vol. 17,1 217. 20 Mar. 2017, doi:10.1186/s12879-017-2305-0
  44. Sekulovich, R E et al. "The herpes simplex virus type 1 alpha protein ICP27 can act as a trans-repressor or a trans-activator in combination with ICP4 and ICP0." *Journal of virology* vol. 62,12 (1988): 4510-22.
